# Supplementary material for: Topographic volume-standardization atlas of the human brain
Source: Brain Struct Funct. 2021 May 7;226(6):1699–711. doi: 10.1007/s00429-021-02280-1 (PMC8203509; doi:10.1007/s00429-021-02280-1)
Supplement: Supplementary file 12 — Supplementary file12 (CSV 68 KB) [file 429_2021_2280_MOESM12_ESM.csv]

ID	Age (years)	Gender	Handedness	Height (cm)	Weight (kg)	Total encephalic volume (with ventricles)	Total encephalic volume (without ventricles)	Fontal pole cortex volume (left)	Fontal pole WM volume (left)	Total volume frontal pole (left)	Fontal pole cortex volume (right)	Fontal pole WM volume (right)	Total volume frontal pole (right)	Total volume frontal pole	F1 cortex volume (left)	F1 WM volume (left)	Total volume F1 (left)	F1 cortex volume (right)	F1 WM volume (right)	Total volume F1 (right)	Total volume F1	F2 cortex volume (left)	F2 WM volume rostral (left)	F2 WM volume caudal (left)	Total volume F2 (left)	F2 cortex volume (right)	F2 WM volume rostral (right)	F2 WM volume caudal (right)	Total volume F2 (right)	Total volume F2	F3 orbital cortex volume (left)	F3 orbital WM volume (left)	Total volume F3 orbital (left)	F3 orbital cortex volume (right)	F3 orbital WM volume (right)	Total volume F3 orbital (right)	Total volume F3 orbital	F3 triangular cortex volume (left)	F3 triangular WM volume (left)	Total volume F3 triangular (left)	F3 triangular cortex volume (right)	F3 triangular WM volume (right)	Total volume F3 triangular (right)	Total volume F3 triangular	F3 opercular cortex volume (left)	F3 opercular WM volume (left)	Total volume F3 opercular (left)	F3 opercular cortex volume (right)	F3 opercular WM volume (right)
1	32	m	left	184	78	1112202	1089693	1685	172	1856	2448	236	2684	4540	17230	18946	36176	18065	19187	37252	73428	10543	11886	7047	29476	10851	13253	6084	30188	59664	944	1084	2028	1010	1092	2102	4130	3547	3997	7544	2726	3307	6033	13577	4799	4800	9599	2367	3265
2	26	f	right	160	50	1011207	999296	933	172	1106	1884	336	2220	3326	14247	15771	30018	14389	16739	31128	61146	7995	11112	6320	25427	8801	11912	6045	26757	52184	756	1021	1777	838	1522	2360	4136	2419	2916	5335	1850	2403	4253	9588	2789	3546	6336	2757	2820
3	39	m	right	187	85	1144360	1119635	1912	346	2258	1872	227	2099	4357	15707	18356	34063	15233	19586	34819	68882	9996	14992	6329	31317	8641	12891	6384	27916	59233	894	1184	2078	852	1330	2182	4261	1394	2352	3746	1607	3153	4760	8506	3737	3140	6877	2698	3594
4	25	f	right	164	52	1132823	1116856	1386	193	1579	2601	294	2895	4474	15599	16858	32458	16139	19429	35568	68026	10798	12811	6958	30567	8163	15752	6179	30094	60661	899	1050	1949	496	1247	1743	3692	1726	2938	4664	2148	3072	5220	9884	2898	3394	6292	2246	2627
5	41	m	right	187	82	1194133	1167252	1918	214	2132	3089	330	3419	5551	18497	19815	38312	16563	17657	34220	72532	10809	14252	6392	31453	10231	16890	4606	31727	63180	573	830	1403	1002	1167	2169	3571	2318	2997	5315	2856	3690	6546	11861	3416	4033	7449	4036	3192
6	33	f	right	166	50	974973	963138	1636	181	1817	3121	502	3624	5440	14444	16050	30494	11579	14131	25710	56204	8279	11496	5851	25626	7153	12036	4352	23541	49167	772	822	1594	864	1062	1926	3520	2373	3082	5455	2086	2931	5017	10472	3201	3514	6716	2501	2530
7	28	m	right	173	66	1254279	1215033	1996	448	2444	2830	244	3074	5519	18296	19720	38016	18828	20038	38866	76881	11787	16112	7679	35578	11521	15647	6130	33298	68876	1405	1008	2413	1215	1486	2701	5114	3014	3579	6593	2234	4016	6250	12844	4308	3732	8040	4380	3886
8	31	m	right	184	84	1215487	1200474	1185	232	1417	2823	492	3315	4732	17938	19107	37045	17009	18901	35910	72955	11611	13429	7010	32050	8419	13087	5152	26657	58707	1064	1174	2238	1094	1554	2648	4886	3856	4118	7974	3533	3929	7462	15437	4450	4834	9284	3541	3550
9	24	f	right	170	60	1033222	1022959	1977	247	2224	2919	237	3156	5380	17465	16169	33634	15657	13817	29474	63108	9512	10547	5270	25329	10413	12163	5474	28050	53379	830	874	1704	855	1050	1905	3609	3170	3290	6460	3020	3041	6061	12521	4181	3256	7437	2557	2333
10	35	f	right	158	62	1069749	1048826	1582	210	1792	2491	314	2805	4597	15367	17171	32538	15093	18706	33799	66337	9648	14275	5488	29411	9517	15335	4396	29248	58658	765	1357	2122	1137	1090	2227	4349	3028	3189	6217	2303	3147	5450	11667	3167	3441	6608	2585	2834
11	31	m	right	183	83	1222517	1208523	1774	212	1986	2138	267	2405	4391	18772	20998	39770	18656	22662	41318	81089	11487	12918	8028	32433	11256	12034	7017	30307	62740	987	960	1947	1045	1182	2227	4174	4158	4648	8806	2890	3798	6688	15494	4596	5577	10173	4041	4076
12	29	m	right	160	70	942635	930967	1185	156	1341	1892	276	2168	3509	14395	14516	28911	12523	13691	26214	55124	7726	9374	5197	22297	6083	9210	4400	19693	41991	617	644	1261	668	1182	1850	3110	2097	2300	4397	2756	3243	5999	10396	3326	3406	6732	3309	3118
13	50	f	right	165	45	1035939	1022307	1447	203	1650	2361	295	2656	4305	14286	17134	31420	13496	16852	30348	61768	9543	11587	6490	27620	8620	12328	5847	26795	54414	460	698	1158	673	1017	1690	2848	2242	2230	4472	2164	2860	5024	9497	2750	3293	6043	2435	3297
14	34	f	right	169	60	978312	965646	1218	165	1383	2663	357	3020	4403	15798	15006	30804	13337	14401	27738	58542	8485	10977	4184	23646	7973	12872	4418	25262	48908	606	756	1362	766	958	1724	3086	2247	2451	4698	2756	3435	6191	10888	3140	3033	6173	2246	2647
15	26	m	right	180	72	1273089	1252021	3775	810	4585	3047	784	3831	8417	18015	23540	41556	15845	19701	35546	77102	13163	16398	8160	37721	9147	21811	4275	35233	72954	286	1204	1490	1273	1397	2670	4160	3243	2599	5842	5315	4797	10112	15954	4335	5008	9343	3439	3344
16	41	f	right	170	58	1011136	1000708	1405	161	1566	1846	356	2202	3768	14485	15648	30133	14397	17100	31497	61630	10520	11802	7045	29367	7671	12802	4504	24977	54344	582	760	1342	847	1305	2152	3494	2746	2883	5629	2664	2842	5506	11135	3685	3948	7633	3316	3506
17	34	f	right	170	57	957542	926958	1648	230	1878	2053	329	2382	4260	13118	14699	27817	13547	13926	27472	55290	7901	10807	5621	24330	5923	10401	3909	20233	44563	666	819	1485	795	1163	1958	3443	2998	2975	5973	1944	2871	4815	10788	2856	4240	7096	2555	2858
18	56	m	right	185	108	1293258	1261414	1627	332	1958	2396	378	2774	4732	19355	23278	42633	17679	21399	39078	81710	12063	16607	8508	37177	9530	16436	6743	32710	69887	1014	1270	2284	872	1644	2516	4801	2547	3519	6066	2243	3300	5543	11609	4110	3889	7999	2771	3870
19	24	m	right	171	67	1151822	1139532	1271	161	1432	2170	321	2491	3923	18006	19809	37815	16783	21400	38183	75999	10646	12122	7830	30598	10035	14895	5678	30608	61206	1166	1062	2228	1157	1326	2483	4712	3173	3827	7000	3174	4282	7456	14455	3296	3905	7201	2947	3017
20	38	f	right	165	56	936875	921292	1366	238	1604	2025	380	2405	4009	14846	14443	29289	15260	16506	31766	61055	9407	12818	5684	27908	8584	12585	4075	25244	53152	697	787	1484	621	1009	1630	3114	2697	3066	5763	2599	3172	5771	11534	3606	3273	6879	2779	3067
21	24	m	right	186	73	1145563	1127236	1929	198	2127	2734	407	3141	5268	18997	17145	36142	18236	16252	34488	70630	11384	11817	6518	29720	10129	13342	5710	29182	58901	1106	853	1959	1171	996	2168	4126	3434	3068	6502	2470	3505	5975	12477	5242	4548	9790	3809	3478
22	57	f	right	167	52	974251	948955	1230	150	1380	2483	336	2819	4199	14910	17646	32556	15499	17040	32539	65095	9352	12150	6764	28266	7146	12968	4841	24954	53221	741	888	1629	770	1250	2020	3649	2477	3264	5741	1703	2548	4251	9992	3630	3672	7302	2227	2749
23	44	m	right	175	80	1206160	1179769	1778	306	2084	3080	380	3460	5544	19119	20452	39571	18323	20008	38331	77902	11121	13442	7724	32287	10186	14155	5943	30284	62571	790	1050	1840	863	1311	2174	4014	2422	3120	5542	2232	3479	5711	11252	3894	3888	7782	4381	4636
24	27	m	right	171	89	1291848	1274242	2237	286	2523	2958	260	3218	5741	19970	20770	40740	21079	23568	44647	85387	12956	16018	6743	35717	11684	14458	6188	32331	68048	934	799	1733	1397	1248	2645	4378	3143	3351	6494	2686	3952	6638	13132	4301	4611	8912	3326	3720
25	31	f	right	170	54	1132555	1109159	1283	214	1497	1366	206	1572	3069	16424	20388	36812	16797	20102	36899	73711	10159	13156	7648	30963	8829	13547	6104	28480	59443	933	1071	2004	441	1295	1736	3740	2783	3484	6267	2235	4114	6349	12616	3136	3984	7120	3375	3822
26	31	m	right	182	88	1121319	1108373	1204	211	1415	2911	273	3184	4598	16127	16954	33082	16562	19281	35843	68924	10055	12490	7455	30000	9292	12780	5233	27305	57305	628	1137	1765	809	1267	2076	3841	3144	2848	5992	2588	3223	5811	11803	3044	3775	6819	3256	3998
27	31	f	right	165	54	1331427	1256262	2026	214	2240	2642	409	3051	5291	22271	25492	47763	18232	22973	41205	88968	12740	14069	8458	35267	13939	18649	7766	40354	75621	1092	1137	2229	1456	1406	2862	5092	2644	3043	5687	2423	3399	5822	11510	3709	3900	7609	2794	3082
28	84	m	right	182	79	1085316	989990	1503	233	1736	2689	354	3043	4779	14290	15518	29808	13531	14221	27752	57560	9947	11858	7827	29633	7805	11900	6595	26300	55933	783	935	1718	905	1234	2140	3858	2207	3146	5353	2206	3148	5354	10708	2771	3038	5809	3607	3961
29	66	m	right	187	75	1241538	1190060	1647	132	1779	2560	209	2769	4548	14432	14962	29394	15863	15879	31742	61136	9000	12940	7450	29391	8769	12932	6331	28031	57422	667	809	1476	772	793	1565	3041	1712	2335	4047	2583	2691	5274	9321	2822	3077	5899	2413	3208
30	70	f	right	172	62	1098802	1046542	1561	216	1777	2502	369	2871	4648	15622	16914	32536	15471	17165	32636	65172	9819	11473	8868	30160	8145	11960	7151	27256	57416	857	1012	1869	557	1122	1679	3548	1842	2497	4339	2251	3156	5406	9745	2827	3458	6285	5157	5302
[truncated: 338 more columns]
